# Supplementary material for: Estimating the burden of influenza-attributable severe acute respiratory infections on the hospital system in Metropolitan France, 2012–2018
Source: Springer Nature journal article supplement (doi:10.1186/s12879-023-08078-2), 2023-03-06

**Additional file 1:** Epidemic seasons of influenza and bronchiolitis

Supplementary box 1. Distribution of epidemic seasons of influenza and bronchiolitis per week, 2012-2018, metropolitan France

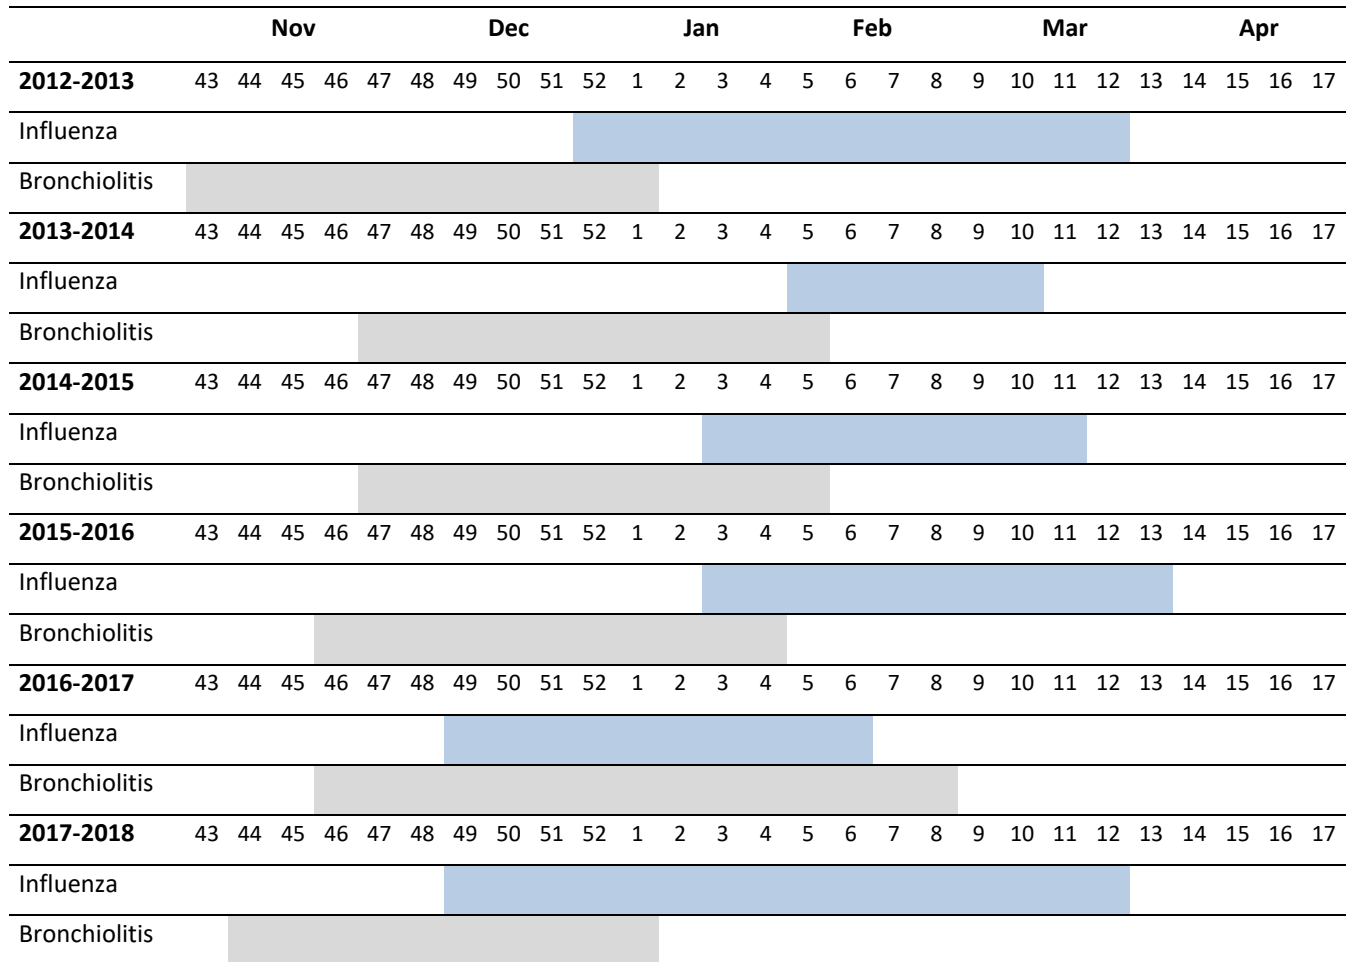

Supplement: MOESM1 [file 24442604]
